# Supplementary material for: Troponin I Levels in Neonatal Hypoxic–Ischemic Encephalopathy Are Related to Cardiopulmonary Comorbidity and Neurodevelopmental Outcomes
Source: MDPI journal article supplement (doi:10.3390/jcm10174010), 2021-09-05
Supplement: s1 [file s1]

**Supplementary Table S1.** The literature review for troponin level correlated with neonatal HIE.

| Authors              | Methods and patients                                                               | Results                                                                                                                                                                   | Significances                                                                                                                                       | Reference |
|----------------------|------------------------------------------------------------------------------------|---------------------------------------------------------------------------------------------------------------------------------------------------------------------------|-----------------------------------------------------------------------------------------------------------------------------------------------------|-----------|
| Munshi et al., 2020  | 104 newborns with hypothermia for HIEs                                             | Significant elevation of troponin I in mild-to-moderate HIE and severe HIE as compared with control                                                                       | A cut-off troponin $\geq$ troponin 0.12 $\mu\text{g/L}$ predicted a sensitivity 77%; specificity 78% ; PPV 68%; NPV 84% for residual encephalopathy | [21]      |
| Alkholi et al., 2017 | 25 HIEs and 25 healthy control                                                     | Cord CKMB at 12.5 U/L had 100% sensitivity and 84% specificity in the detection of severe HIE infants                                                                     | Serum CKMB in HIE infants were significantly increased early in HIE.                                                                                | [26]      |
| Shastri et al., 2012 | 60 neonatal HIEs                                                                   | Serum troponin I and duration of inotropic support were significantly greater with increasing severity                                                                    | Troponin before 36 hours of birth correlate strongly with HIE grading and with duration of inotropic use.                                           | [27]      |
| Bhasin et al., 2019  | 23 neonatal stage I, 10 stage II and 8 stage III HIEs, and with non-HIEs (control) | Troponin T raised in 13 (56.5%) HIE. CK, CKMB and troponin were higher ( $p < 0.05$ ) in non-survivors.                                                                   | Cardiac enzymes changes associated with increasing severity and mortality.                                                                          | [28]      |
| Joseph et al., 2018  | 120 neonatal HIEs                                                                  | Myocardial dysfunction had higher troponin T ( $0.277 \pm 0.231 \text{ ng/ mL}$ ) than without myocardial dysfunction ( $0.061 \pm 0.036 \text{ ng/ mL}$ , $p < 0.005$ ). | Significant relation with increasing troponin values and increasing grading of HIE                                                                  | [22]      |

HIE indicates hypoxic-ischemic encephalopathy; PPV, positive predictive value; NPV, negative predictive value; CK, creatine phosphokinase; CKMB, creatine kinase Mb.
